# Supplementary material for: POM.gpu-v1.0: a GPU-based Princeton Ocean Model
Source: Copernicus journal article supplement (doi:10.5194/gmd-8-2815-2015), 2015-09-09
Supplement: Supplementary file 1 [file gmd-8-2815-2015-supplement.zip]

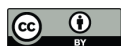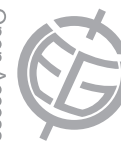

*Supplement of*

## **POM.gpu-v1.0: a GPU-based Princeton Ocean Model**

**S. Xu et al.**

*Correspondence to:* X. Huang ([hxm@tsinghua.edu.cn](mailto:hxm@tsinghua.edu.cn))

- `gmd-8-2815-2015-supplement-title-page.pdf`
- `exp00x_cuda_GMD_submit`
  - `exp00x_cuda_GMD_submit`
    - \* `Readme`
    - \* `makefile`
    - \* `pom`
    - \* `pom.h`
    - \* `run_exp001.sh`
    - \* `run_exp002.sh`

The copyright of individual parts of the supplement might differ from the CC-BY 3.0 licence.
